# Supplementary material for: Interconnection of organic–inorganic hybrid nano-building blocks towards thermally robust mesoporous structures
Source: Royal Society of Chemistry journal article supplement (doi:10.1039/d0nr08689d), 2021-01-01
Supplement: d0nr08689d4.pdf [file d0nr08689d4.pdf]

## ChemNMR $^1\text{H}$ Estimation

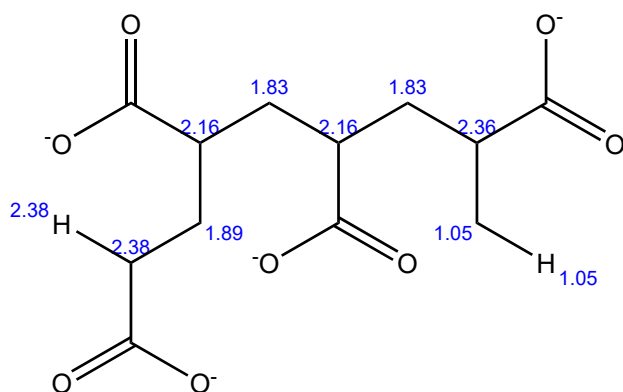

Estimation quality is indicated by color: **good**, **medium**, **rough**

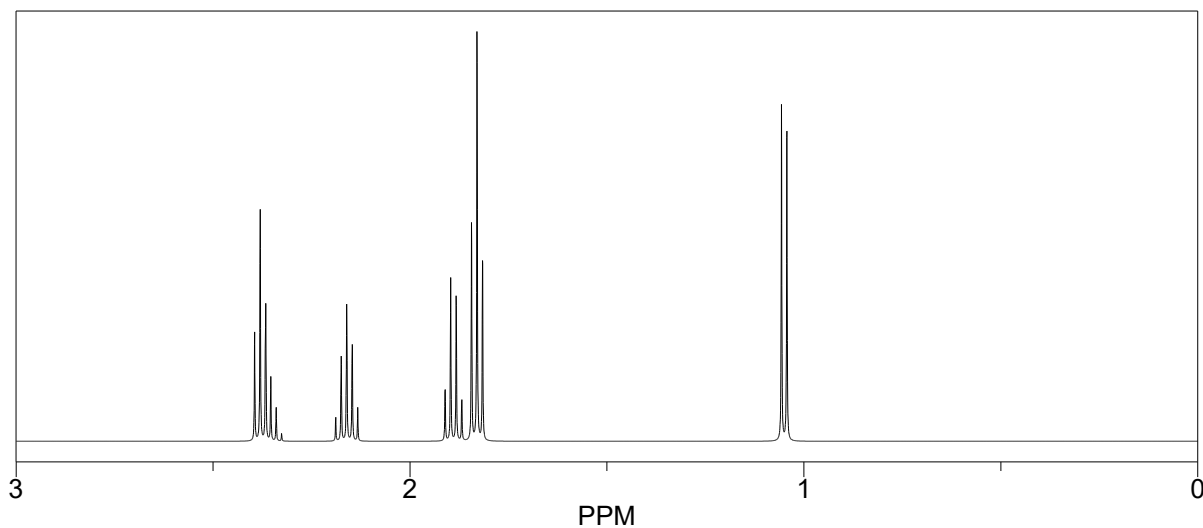

Protocol of the H-1 NMR Prediction (Lib=SU Solvent=DMSO 500 MHz):

| Node | Shift | Base + Inc. | Comment (ppm rel. to TMS) |
|------|-------|-------------|---------------------------|
| CH   | 2.16  | 1.50        | methine                   |
|      |       | 0.86        | 1 alpha -C=O              |
|      |       | -0.10       | 1 beta -C                 |
|      |       | -0.10       | 1 beta -C                 |
| CH   | 2.16  | 1.50        | methine                   |
|      |       | 0.86        | 1 alpha -C=O              |
|      |       | -0.10       | 1 beta -C                 |
|      |       | -0.10       | 1 beta -C                 |
| CH   | 2.36  | 1.50        | methine                   |
|      |       | 0.86        | 1 alpha -C=O              |
|      |       | 0.10        | 1 alpha -C                |
| CH2  | 2.38  | -0.10       | 1 beta -C                 |
|      |       | 1.37        | methylene                 |
|      |       | 1.07        | 1 alpha -C=O              |
| CH2  | 1.83  | -0.06       | 1 beta -C                 |
|      |       | 1.37        | methylene                 |
|      |       | 0.29        | 1 beta -C=O               |
| CH2  | 1.83  | -0.06       | 1 beta -C                 |
|      |       | 0.29        | 1 beta -C=O               |
|      |       | -0.06       | 1 beta -C                 |
|      |       | 1.37        | methylene                 |
| CH2  | 1.83  | 0.29        | 1 beta -C=O               |
|      |       | -0.06       | 1 beta -C                 |
|      |       | 0.29        | 1 beta -C=O               |
|      |       | -0.06       | 1 beta -C                 |

|     |      |      |       |                     |
|-----|------|------|-------|---------------------|
| CH2 | 1.89 | 1.37 | 0.29  | 1 beta -C=O         |
|     |      |      | 0.29  | 1 beta -C           |
|     |      |      | -0.06 | 1 beta -C=O         |
|     |      |      | 0.29  | 1 beta -C=O         |
| CH3 | 1.05 | 0.86 |       | methyl              |
|     |      |      | 0.21  | 1 beta -C=O         |
|     |      |      | 0.05  | 1 beta -CC          |
|     |      |      | -0.07 | general corrections |
| H   | 2.38 | 1.37 |       | methylene           |
|     |      |      | 1.07  | 1 alpha -C=O        |
|     |      |      | -0.06 | 1 beta -C           |
| H   | 1.05 | 0.86 |       | methyl              |
|     |      |      | 0.21  | 1 beta -C=O         |
|     |      |      | 0.05  | 1 beta -CC          |
|     |      |      | -0.07 | general corrections |

#### 1H NMR Coupling Constant Prediction

| shift | atom index | coupling partner, | constant and vector |
|-------|------------|-------------------|---------------------|
| 2.16  | 9          | 13                | 7.0 H-C-CH-H        |
|       |            | 8                 | 7.0 H-C-CH-H        |
| 2.16  | 14         | 13                | 7.0 H-C-CH-H        |
|       |            | 18                | 7.0 H-C-CH-H        |
| 2.36  | 3          | 8                 | 7.0 H-C-CH-H        |
|       |            | 1                 | 6.8 H-C-CH2-H       |
|       |            | 2                 | 6.8 H-C-CH2-H       |
| 2.38  | 19         | 18                | 7.1 H-CH-CH-H       |
| 1.83  | 13         | 9                 | 7.0 H-CH-C-H        |
|       |            | 14                | 7.0 H-CH-C-H        |
| 1.83  | 8          | 9                 | 7.0 H-CH-C-H        |
|       |            | 3                 | 7.0 H-CH-C-H        |
| 1.89  | 18         | 14                | 7.0 H-CH-C-H        |
|       |            | 4                 | 7.1 H-CH-CH-H       |
|       |            | 19                | 7.1 H-CH-CH-H       |
| 1.05  | 2          | 3                 | 6.8 H-CH2-C-H       |
| 2.38  | 4          | 18                | 7.1 H-CH-CH-H       |
|       |            | 3                 | 6.8 H-CH2-C-H       |
| 1.05  | 1          | 3                 | 6.8 H-CH2-C-H       |
